# Supplementary material
Source: Royal Society of Chemistry journal article supplement (doi:10.1039/d6tb00637j)
Supplement: d6tb00637j1.pdf [file d6tb00637j1.pdf]

# Decellularized Scaffold of Porcine Uterus Reconstructs the Endometrial Microenvironment to Promote Uterine Epithelial Cell Differentiation and Organoid Formation

Jiekun Sun<sup>1,2#</sup>, Yuan Cheng<sup>1,2#</sup>, Danyang Song<sup>1,2</sup>, Haiyue Xu<sup>1,2</sup>, Yu Song<sup>1,2</sup>, Hua Ni<sup>1,2\*</sup>, Tingsheng Yan<sup>1,2\*\*</sup>

<sup>1</sup> Key Laboratory of Animal Cellular and Genetic Engineering of Heilongjiang Province, Northeast Agricultural University, Harbin, Heilongjiang 150030, China;

<sup>2</sup> College of Life Science, Northeast Agricultural University, Harbin 150030, China

# These authors contributed equally to this work.

\*\* Correspondence: yantingsheng@neau.edu.cn (Tingsheng Yan)

\* Correspondence: huani@neau.edu.cn (Hua Ni)

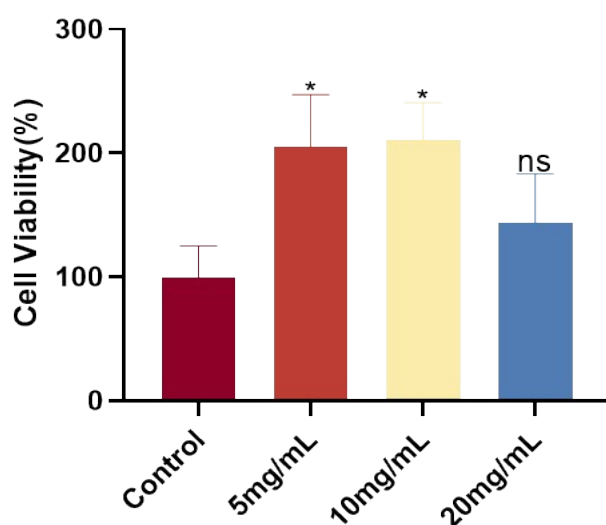

S 1 Effect of DECM scaffold extracts at different concentrations on the proliferation of human umbilical vein endothelial cells (HUVECs). Data are expressed as mean  $\pm$  standard deviation (SD), each experiment was repeated three or more times, and one-way analysis of variance was used for statistical analysis (ns,  $p > 0.05$ ; \*,  $p < 0.05$ ).

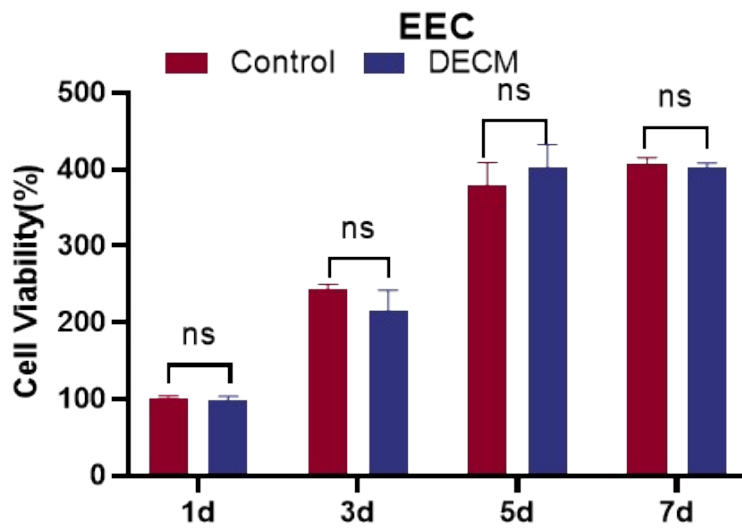

S 2 Effects of DECM extract on proliferation of endometrial epithelial cells (EECs). Data are expressed as mean  $\pm$  standard deviation (SD), each experiment was repeated three or more times, and two-way analysis of variance was used for statistical analysis (ns,  $p > 0.05$ ).

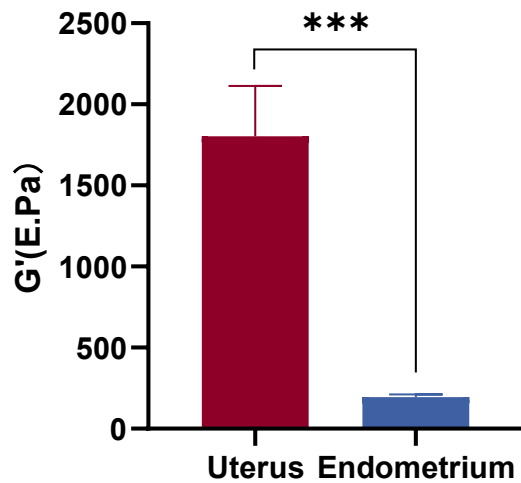

S 3 Elastic modulus of natural porcine uterine tissue and the endometrium. Data are expressed as mean  $\pm$  standard deviation (SD), each experiment was repeated three or more times, and t-test analysis of variance was used for statistical analysis (\*\*\*,  $p < 0.001$ ).

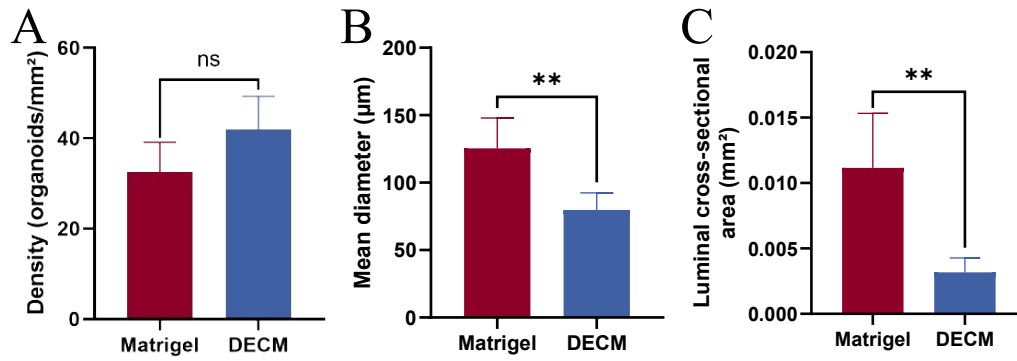

S 4 Quantitative characterization of EEOs cultured in Matrigel and recellularized porcine endometrial decellularized scaffolds.

(A) Number of EEOs per field of view cultured in Matrigel and recellularized porcine endometrial decellularized scaffolds; (B) Dimensions of EEOs cultured in Matrigel and recellularized porcine endometrial decellularized scaffolds; (C) Luminal cross-sectional area of EEOs cultured in Matrigel and recellularized porcine endometrial decellularized scaffolds. Data are expressed as mean  $\pm$  standard deviation (SD), each experiment was repeated three or more times, and t-test analysis of variance was used for statistical analysis (\*\*,  $p < 0.01$ ).
